# 1 **Trends and Determinants of Neonatal Mortality in Rural**

## 2 **Ethiopia**

3 Sintayehu Asaye<sup>1</sup>, Dawit Saketa<sup>2</sup>, Dires Birhanu<sup>3</sup>, Tadesse Gudeta<sup>1</sup>, Merga Besho<sup>4</sup>, Masrie Getnet,  
4 Gurmesa Tura Debelew<sup>1</sup>, Negalign Berhanu<sup>1</sup>, Yibeltal Siraneh<sup>1</sup>, Fira Abamecha<sup>1</sup>, Dessalegn  
5 Tamiru<sup>1</sup>

6 <sup>1</sup>Institute of Health, Jimma University, Jimma, Ethiopia

7 <sup>2</sup>College of Natural and Computational Sciences, Wollega University, Wollega, Ethiopia

8 <sup>3</sup>College of Health Science, Dilla University, Dilla, Ethiopia

9 <sup>4</sup>Institute of Health Science, Wollega University, Wollega, Ethiopia

10 Correspondence: Sintayehu Asaye (P.O. Box 378, Jimma University, Ethiopia)

11 Tel+251917806945

12 Fax+251471112202

13 Email [sintayehus955@gmail.com](mailto:sintayehus955@gmail.com)

14

15

16

17

18

19

20

21 **Abstract:**

22 **Background:** Neonatal mortality is a significant challenge that affects babies within the first 28  
23 days of life. The issue is particularly challenging for healthcare systems in developing countries,  
24 where interventions are required. Although there has been a decline in neonatal mortality  
25 worldwide, comprehensive data on the patterns of neonatal mortality and the contributing factors  
26 in rural regions of Ethiopia is lacking.

27 **Objective:** To determine neonatal mortality trends and mortality in rural Ethiopia using 2011-  
28 2019 DHS data

29 **Methods:** Ethiopian demographic health survey (EDHS) program conducted a cross-sectional  
30 community-based study in rural Ethiopia in 2011, 2016, and 2019. The study included women  
31 who gave birth within the specified timeframe and agreed to participate. Sampling was done  
32 through a multistage cluster approach, and STATA version 17 was used to analyze the data.  
33 Predictor variables were validated through multiple logistic regression analysis. Weighted  
34 estimates were used to derive population-level statistics and a p-value less than 0.05 was  
35 considered significant.

36 **Results:** The study analyzed data from 22,755 women who participated in EDHS surveys  
37 between 2011 and 2019. Neonatal mortality rates decreased from 7.5% to 6.03%. Regional  
38 variations were observed, with Gambela and Tigray having the lowest rates, and Dire Dawa and  
39 the Somali region having higher rates. Factors like mother's age, wealth index, birth order,  
40 neonate's sex, and presence of twins, immediate breastfeeding, and baby's size were associated  
41 with neonatal mortality.

42 **Conclusion and recommendation:** Despite significant advancements that have been made to  
43 decrease neonatal mortality, there remain challenges that need to be addressed. Therefore,  
44 regional health bureaus should strengthen their strategies to enhance antenatal care (ANC) visits  
45 and promote birth delivery at health facilities.

46 **Keywords:** Neonatal mortality, trends, Determinants, Rural, Ethiopia

## 47 **Background**

48 Neonates are newborns up to 28 days old. [1,2]. Neonates can be classified by gestational age,  
49 birth weight, and based on the combination of gestational age with birth weight[3].

50 Neonatal death is a serious problem that occurs within the first 28 days of life due to different  
51 factors which can be from prenatal, intra-natal, or post natal driven causes [4,5] .Commonly,  
52 neonatal mortality is expressed by the rate in which it states that the number of deaths during the  
53 first four weeks of life per 1000 live births in a given time. Based on time to death, neonatal  
54 mortality can be subdivided into very early (<1 day), early (1-7days), and late neonatal deaths  
55 [6].

56 Neonatal mortality rate is the highest within the first seven days of life, with 75% of deaths  
57 occurring during that time. Roughly one million neonates die within 24 hours of being born.  
58 Preterm-related complications, perinatal-related complications, and infections are the leading  
59 causes of neonatal mortality.[6].

60 The three major causes of neonatal deaths globally are infections (36%), pre-term delivery  
61 (28%), and birth asphyxia (23%) [7]. Africa loses 1.12 million neonates yearly due to

62 preventable causes including prematurity, low birth weight, infections, lack of oxygen, and birth  
63 trauma. [8].

64 In 2021, 2.3 million children died in the first month of life worldwide or approximately 6,400  
65 newborns per day. The annual death toll could reach up to 2.5 million people, mostly in low- and  
66 middle-income countries (LMICs), where basic human rights are completely ignored[9,10]. Of  
67 the total global neonatal mortality, 80% took place in Sub-Saharan Africa and Southern Asia, of  
68 which two-thirds and three-quarters of the deaths occurred on the first and seventh day of life  
69 respectively. The place of neonatal birth matters the survival which increases by 20 times higher  
70 in sub-Saharan Africa and Southern Asia and higher for newborns during conflicts[9].

71 The burden of neonatal mortality is not only limited to the neonates themselves but has  
72 multilevel effects on country profile, family spiritual life, family health, family social relation,  
73 family economy, and siblings and it can cause divorce to the partner due to the blame,  
74 mistreated, and dishonored[11,12]. Neonatal mortality is painful full which can cause for parental  
75 psychosocial problems which may result in self-suicide to the family[11].

76 Professionals who work in neonatal intensive care units are more likely to be present during the  
77 end-of-life time for neonates, which can hurt their emotions and practice. Coping with the death  
78 of newborns is a highly stressful task that can lead to post-traumatic stress symptoms and  
79 burnout in professionals[13].

80 The Sustainable Development Goals (SDG) aims to end preventable deaths of newborns and  
81 children under the age of five by 2030. All countries should strive to reduce newborn mortality  
82 to at least 12 deaths per 1000 live births and under-five mortality to at least 25 deaths per 1000

83 live births. However, in rural Ethiopia, the neonatal mortality rate is still very high, standing at  
84 62 deaths per 1000 live births. This is significantly higher than the SDG targets[14].

85 As per current trends of neonatal mortality, it is projected that 1·8 million neonates would die in  
86 2030, however if each country achieved the SDG target, there would be about 1·2 million  
87 neonatal deaths. Achieving this goal requires increased efforts to enable continued improvements  
88 in child survival[15].

89 The study conducted in China showed the neonatal mortality had steadily decreased from 5·9  
90 deaths per 1000 live births in 2014 to 3·9 deaths per 1000 live births in 2018, which was lower  
91 than the target of SDG3 at the national level[16].The systematic review conducted in Brazil  
92 showed that the average neonatal mortality rate was 9·46 deaths/1,000 live births in 2017, with a  
93 reduction of 2·15% between 2007 to 2017[17].In the systematic review from South East Asia  
94 Countries Indonesia was the country with the highest neonatal mortality of 61 live births per  
95 1000 live birth in 2017, the trend decreased gradually from 103 per 1000 live birth in 2000[18].  
96 In Nepal though the neonatal mortality is decreasing, if it continues with current rate, it will take  
97 another 50 years for the country to attain the 2030 SDG target. NMR declined by an average of  
98 only 4·0% between 2001 and 2016[19].In Ghana there has been a steady decline in neonatal  
99 mortality from 30 per 1000 live birth in 1998 to 25 per 1000 live births in 2017 for all births  
100 [20]. In Burundi, the NMR was declined from 38·7 per 1000 live births in 2010 to 25·0 deaths  
101 per 1000 live births in 2016, respectively. The richer wealth quintile has slightly higher NMR  
102 than other parts of the country[21].The review results conducted in Kenya showed that the  
103 neonatal mortality rate has fallen gradually from 35·4 deaths per 1000 live births in 1975 to 19·6  
104 deaths per 1000 live births in 2018[8].

105 In Ethiopian the neonatal mortality rate declined by 1.9% per annum from 1995 to 2010,  
106 logarithmically[7]. However, neonatal death rates climbed from 29 per 1,000 live births in the  
107 Ethiopian demographic health survey (EDHS2016) to 30 per 1,000 live births in the Ethiopian  
108 mini demographic health survey (EMDHS 2019) report[7,21–23]. Despite its increment there are  
109 significant variations across specific regions of the country. For instance, in the Somalia region,  
110 around 130 newborns do not survive beyond the first week of life, the estimated NMR is 54 per  
111 1,000 live births in Oromia, and 46 per 1000 live birth in Amhara region. Ethiopia's progress was  
112 slow, and it fell well short of the UN's ambitious aim of avoiding unnecessary infant deaths and  
113 lowering neonatal mortality to 12 per 1,000 live births in every nation by 2030[22].

114 It has been observed that the male neonate had a higher likelihood of dying in the first four week  
115 of life when compared to their female counterpart. This finding was consistently found in the  
116 study conducted using DHS data in Zambia[24], Afghanistan[25], Nigeria[26], Burundi[21] and  
117 Bangladesh[27].

118 Previous studies have established that prolongation of the birth interval between two subsequent  
119 pregnancies of more than 24 months (about 2 years) had a positive significant effect on neonatal  
120 survival. In the study conducted using DHS data in Nepal a birth interval shorter than 24 months  
121 (about 2 years) was found a significant predictor of neonatal mortality[20]. In Zambia, the study  
122 from ZDHS data found that longer birth interval was associated with low neonatal mortality.  
123 Similarly, the study conducted in Ethiopia using EDHS 2016 data found a Children delivered at a  
124 birth interval of greater than 24 months (about 2 years) had higher chance of surviving their  
125 neonatal period[20,25].

126 In medical literature multiple pregnancy are classified as high-risk birth because they are  
127 associated with increased fetal and neonatal complications compared to singletons. This finding  
128 was similar in the study conducted using DHS in Ghana [20] and Afghanistan [25] and  
129 Ethiopia[7]. In the study conducted in Afghanistan the two extreme maternal age (age below 18  
130 years and above 35 years old) are more likely linked to increased neonatal mortality when  
131 compared to maternal age between 20-30 years old[25].

132 In the retrospective cohort study conducted in Brazil[17] the neonate born to mothers who were  
133 having a child for the first time had higher chances of dying compared to those with mothers  
134 who were multiparous. Contradicting to this finding the DHS data study conducted in Ghana  
135 found that high parity was associated with a higher neonatal mortality[20].

136 In study conducted with DHS data from Ghana the risk of neonatal mortality Among mothers  
137 who did not attend ANC, was approximately five times as high as the risk of neonatal deaths for  
138 mothers who attended ANC. Consistent finding was reported across the study conducted in  
139 Afghanistan, Nigeria and Ethiopia[7,25,26].

140 Study conducted in Zambia also reveal that the survival chance for the children born to mother's  
141 using contraceptives were 66 per cent more likely to compare to children born to mothers not  
142 using contraceptives[28]. Consistent to the study mentioned above, In the longitudinal study  
143 done in North-western Ethiopia mothers who were using contraceptives were two times less  
144 likely to lose a child compared to mothers who were not using contraceptives[20].

145 Neonatal mortality rates are still a significant problem and require ongoing research to address.  
146 Specifically, there is a need to focus on trends in rural areas of Ethiopia where there may be a  
147 lack of access to specialized facilities and professionals. While there have been some studies

148 conducted in these areas, there is no evidence available to fully understand the trends in neonatal  
149 mortality rates and associated factors in rural areas of Ethiopia from 2011 to 2019. Therefore,  
150 this study aimed to analyze EDHS data from 2011 to 2019 to better understand these trends and  
151 contributing factors in rural Ethiopia.

## 152 **Materials and Methods**

### 153 **Study Area, Design, and Period**

154 Community-based cross-sectional study was conducted on the rural population across all  
155 administrative regions of Ethiopia by EDHS program from the period 2011, 2016, and 2019.

### 156 **Participant's Selection and Exclusion**

157 Regarding inclusion and exclusion criteria, these criteria are essential for defining the study  
158 population and ensuring that the analysis focuses on relevant data. In the context of neonatal  
159 mortality analysis using EDHS data:

#### 160 **Inclusion Criteria:**

- 161 • Participants within the specified age range
- 162 • Participants from the selected geographic areas covered by the EDHS.
- 163 • Participants for whom complete and relevant data on neonatal mortality and potential  
164 determinants are available.

#### 165 **Exclusion Criteria:**

- 166 • Participants outside the defined age range.



167 • Incomplete or missing data on neonatal mortality or key determinants.

168 • Participants from areas not covered by the EDHS.

## 169 **Source Population**

170 All women of reproductive age living in rural Ethiopia during the EDHS surveys of 2011, 2016,  
171 and 2019 were considered as the source population.

## 172 **Study population**

173 All pregnant women residing in rural areas of Ethiopia during 2011, 2016, and 2019, as recorded  
174 in the Ethiopian Demographic and Health Surveys (EDHS), were included as the study  
175 population.

## 176 **Sample Size Determination and Sampling Techniques**

177 All pregnant who gave birth in rural Ethiopia during the years 2011, 2016, and 2019 were  
178 included in the Ethiopian Demographic and Health Surveys (EDHS) and households were  
179 selected via multistage cluster sampling to include pregnant women who gave birth and  
180 volunteered to participate in the study.

## 181 **Study variables**

182 Neonatal mortality is defined as the death of a newborn within the first 28 days of life, as  
183 reported by the Ethiopian Demographic and Health Survey (EDHS). It is considered a dependent  
184 variable in this study. The independent variables that were considered in the study were age,  
185 region, altitude, religion, education, marital status, household access to media, source of drinking  
186 water, type of toilet facility, type of cooking fuel, wealth index of the household, number of  
187 living children, birth order number, number of antenatal visits, whether the child is a twin, sex of  
188 the child when it is put to the breast, place of delivery, delivery by cesarean section, and size of  
189 the child at birth.

### 190 **Data Quality Assurance**

191 The data was extracted from the EDHS website after getting formal permission to access the data  
192 for research purposes only. Then the required data is meticulously exploited for the analysis and  
193 it was analyzed carefully using software and the data were also checked for missing values.

### 194 **Data Processing and Analysis**

195 The neonatal mortality data from the DHS are analyzed using frequencies, percentages, cross  
196 tabulations, and multiple logistic regression statistical methods, taking into account the complex  
197 survey design. Weighted estimates are produced to generate population-level statistics.

198 Multiple logistic regression analysis was utilized where neonatal mortality coded as 0 and 1,  
199 where 0 indicates that the outcome of interest died, and 1 indicates absence outcome of interest,  
200 alive.

201 After a result from the logistic regression model with a logit link function, computing a marginal  
202 effect or risk difference often has numerous advantages as it estimates percentage point change,  
203 not a percent change. As we add more variables to the model, the marginal effects are not

204 sensitive, and they remain unchanged. To compute the marginal effects, the change in probability  
205 when the discrete value of 1 of the independent variable changed is calculated.

206 Among the various logistic regression model fit assessment criteria, the commonly used  
207 measures, such as the Hosmer-Lemeshow test, the link test, the receiver operating characteristic  
208 (ROC) curve, pseudo R-squared, Residual Analysis, and outlier detection were used. All  
209 analyses were performed with Stata v. 17.

## 210 **Data Collection Techniques**

211 Data were extracted from Ethiopia Demographic and Health Surveys (EDHS) conducted in  
212 2011, 2016, and 2019 based on the outcome of interest, neonatal mortality. Request to EDHS  
213 made on Jan 15, 2024 to access the data for research purpose and we obtained the data on date  
214 Jan 16, 2024 with affirmation letter from EDHS team. The DHS employed a multistage cluster  
215 sampling design to select households for participation. The authors got a permission to access the  
216 EDHS data from the ICF-DHS program[29].

## 217 **Results**

### 218 **Background characteristics**

219 Out of the 22,755 participants, the majority of data were obtained from the 2011 EDHS: 9663  
220 (42.5%), while 8667 (38.1%) were extracted from the 2016 EDHS. Many participating neonates,  
221 9699 (42.6%), were obtained from an altitude between 1501 and 2300 meters high, followed by  
222 neonates from an altitude of 501 to 1500 meters high, 7515 (33%). That means more than 75%  
223 of the EDHS data on neonatal mortality used for this study were obtained from a cluster at an  
224 altitude of 501 to 2300 meters. Geographically, the DHS data used for this study were extracted  
225 from the rural distribution of all regions. Oromiya (16.4%), SNNPR(Southern Nations

226 Nationalities Peoples’ Region) (14.5%), Amhara (11.2%), Afar (11.0%), and Somali (10.9%)  
 227 regions tend to have a higher number of neonate participants in the study compared to the other  
 228 rural regions. A smaller number of neonatal deaths in rural areas of Dire Dawa city  
 229 administration and Harari region were included (4.1%, and 4.8%, respectively) (**Table 1**).

230 **Table 1:-** Demographic Variables for trends and determinants of neonatal mortality in rural  
 231 Ethiopia, EDHS, 2011, 2016 and 2019

| <b>Variable</b>                   | <b>Category</b>   | <b>Frequency</b> | <b>Percentage</b> |
|-----------------------------------|-------------------|------------------|-------------------|
| <b>Ethiopian DHS Year</b>         | 2011              | 9663             | 42.5              |
|                                   | 2016              | 8667             | 38.1              |
|                                   | 2019              | 4425             | 19.4              |
| <b>Cluster altitude in meters</b> | <500m             | 2337             | 10.3              |
|                                   | 501–1500m         | 7515             | 33.0              |
|                                   | 1501–2300m        | 9699             | 42.6              |
|                                   | >2300m            | 3204             | 14.1              |
| <b>Region</b>                     | Tigray            | 2,302            | 10.12             |
|                                   | Afar              | 2503             | 11.0              |
|                                   | Amhara            | 2538             | 11.2              |
|                                   | Oromiya           | 3743             | 16.4              |
|                                   | Somali            | 2487             | 10.9              |
|                                   | Benishangul-Gumuz | 2227             | 9.8               |
|                                   | SNNP              | 3310             | 14.5              |
|                                   | Gambela           | 1641             | 7.2               |
|                                   | Harari            | 1082             | 4.8               |
|                                   | Dire Dawa         | 922              | 4.1               |
| <b>Total</b>                      |                   | <b>22755</b>     | <b>100</b>        |

232 Among 15623 (68.7%) of mothers have three or more living children, and 7132 (31.3%) have  
 233 fewer than three living children. The age distribution of the mothers was examined, revealing a  
 234 predominantly adult demographic profile. The majority of individuals fell within the 25–34 age  
 235 range, constituting 11599 (51%) of the total population. The income distribution analysis  
 236 demonstrated significant heterogeneity among the participating mothers. The majority of  
 237 respondent mothers, 14050 (61.7%), indicated a poor wealth index, while 4683 (20.6%) and  
 238 4022 (17.7%) of mothers reported a rich and middle wealth index, respectively. The number of  
 239 antenatal care service visits during pregnancy disparities was also observed among mothers.

240 While 50% of the women did not attain the optimal number of ANC service visits—at least four  
 241 ANC visits—it has been reported that the attendance status of more than one-third of the  
 242 mothers, 34.5%, was not reported. Only 15.4% of the mothers were reported to have attained the  
 243 optimal level of at least four ANC visits. This suggests that a significant proportion of mothers in  
 244 rural Ethiopia didn't attend the optimal ANC visits, which may have implications for neonatal  
 245 mortality.

246 The marital status of mothers indicates that the majorities of them (94.2%) are married and live  
 247 with their husbands. Examining educational attainment levels reveals that a substantial portion of  
 248 the participating mothers (72.0%) had no formal education. Educated cohorts tend to have higher  
 249 rates of infant treatment, indicating improvements in neonatal mortality. The distribution of  
 250 religious affiliations of mothers in the study was analyzed, and Muslims were found to be the  
 251 substantial group, followed by the Orthodox religion (**Table 2**).

252

253 **Table 2:-**Mother's background characteristics for trends and determinants of neonatal mortality  
 254 in rural Ethiopia, EDHS, 2011, 2016 and 2019

| Variable                                    | Category                | Frequency | Percentage |
|---------------------------------------------|-------------------------|-----------|------------|
| Number of living children                   | <3                      | 7132      | 31.3       |
|                                             | >=3                     | 15623     | 68.7       |
| Maternal Age in years                       | <=24 years              | 5599      | 24.6       |
|                                             | 25-34 years             | 11599     | 51.0       |
|                                             | > 35-49 years           | 5557      | 24.4       |
| Wealth index                                | Poor                    | 14050     | 61.7       |
|                                             | Middle                  | 4022      | 17.7       |
|                                             | Rich                    | 4683      | 20.6       |
| Number of antenatal visits during pregnancy | Not optimal             | 11408     | 50.1       |
|                                             | Optimal                 | 3495      | 15.4       |
|                                             | Unknown                 | 7852      | 34.5       |
| Marital Status                              | Never married           | 93        | 0.4        |
|                                             | Married/Living together | 21443     | 94.2       |
|                                             | Widowed/Divorced        | 976       | 4.3        |
|                                             | Not living together     | 243       | 1.1        |

|                            |              |              |            |
|----------------------------|--------------|--------------|------------|
| Maternal educational level | No education | 16387        | 72.0       |
|                            | Primary      | 5580         | 24.5       |
|                            | Secondary    | 616          | 2.7        |
|                            | Higher       | 172          | 0.8        |
| Religion                   | Orthodox     | 6178         | 27.2       |
|                            | Catholic     | 181          | 0.8        |
|                            | Protestant   | 4429         | 19.5       |
|                            | Muslim       | 11487        | 50.5       |
|                            | Traditional  | 252          | 1.1        |
|                            | Other        | 228          | 1.0        |
| <b>Total</b>               |              | <b>22755</b> | <b>100</b> |

255

## 256 **Household and Health service Related Characteristics**

257 In this study of households' access to facility characteristics, we found that 15715 (69.1%) of  
 258 mothers use unprotected sources of drinking water, and 12989 (57.1%) do not access toilet  
 259 facilities, while the remaining 7040 (30.9%) and 9766 (42.9%) of rural mothers access protected  
 260 drinking water and toilet facilities, respectively. The summary table also reveals that more than  
 261 half of the surveyed population, 69.6%, did not have access to television and radio. More than  
 262 90% of these mothers use wood as a fuel for cooking and other activities. Access to facilities  
 263 such as protected sources of drinking water, utilization of toilet facilities, access to the media,  
 264 and use of electricity for cooking and food preparation as a fuel has a likelihood to support  
 265 mothers and childcare, implying a decrease in infant mortality (**Table 3**).

266 **Table 3:-** Facility accessibility characteristics for trends and determinants of neonatal mortality  
 267 in rural Ethiopia, EDHS,2011, 2016 and 2019

| Variable                 | Category             | Frequency | Percentage |
|--------------------------|----------------------|-----------|------------|
| Source of drinking water | Protected            | 7040      | 30.9       |
|                          | Unprotected          | 15715     | 69.1       |
| Type of toilet facility  | Use toilet facility  | 9766      | 42.9       |
|                          | No toilet facility   | 12989     | 57.1       |
| Access to Media          | No access to media   | 15844     | 69.6       |
|                          | With access to media | 6911      | 30.4       |
| Type of cooking fuel     | Electricity          | 67        | 0.3        |
|                          | Gas                  | 18        | 0.1        |
|                          | Charcoal             | 403       | 1.8        |

|              |                   |       |      |
|--------------|-------------------|-------|------|
|              | Wood              | 20623 | 90.6 |
|              | Agricultural crop | 294   | 1.3  |
|              | Animal dung       | 811   | 3.6  |
|              | Other             | 539   | 2.4  |
| <b>Total</b> |                   | 22755 | 100  |

268

269 **Neonatal and delivery related characteristics**

270 As depicted in the table below, 51.4% of the children in the sample are male, while 48.6% are  
 271 female. This indicates a slight imbalance in the sex distribution, with slightly more males than  
 272 females. The distribution of neonatal mortality status in rural areas between the 2011, 2016, and  
 273 2019 EDHS data of this study disclose that 6.9% of the neonates in the sample died, while 93.1%  
 274 survived. This provides insight into the mortality rate among neonates in the studied population.  
 275 The status of the infant regarding the time she or he started breastfeeding was analyzed and  
 276 found that 59.5% of the children were put in the breast immediately after birth, while 40.5%  
 277 were not. This suggests that a significant portion of children did not receive immediate  
 278 breastfeeding after birth. The distribution of child sizes at birth was also another variable of  
 279 interest, which shows that 23.9% were classified as large, 31.9% as average, and 24.8% as  
 280 smaller. Additionally, 19.4% have an unknown size. This indicates variability in the size of  
 281 children at birth within the sample, with a notable proportion having an unknown size (**Table 4**).

282 **Table 4:-** Neonatal and maternal related characteristics for trends and determinants of neonatal  
 283 mortality in rural Ethiopia, EDHS, 2011, 2016 and 2019

| Variable                 | Category                | Frequency | Percentage |
|--------------------------|-------------------------|-----------|------------|
| Sex of child             | Male                    | 11707     | 51.4       |
|                          | Female                  | 11048     | 48.6       |
| Neonatal Mortality       | Died                    | 1559      | 6.9        |
|                          | Alive                   | 21196     | 93.1       |
| When child put to breast | Immediately after birth | 13535     | 59.5       |
|                          | Not immediately         | 9220      | 40.5       |
| Size of child at birth   | Large                   | 5428      | 23.9       |
|                          | Average                 | 7262      | 31.9       |
|                          | Smaller                 | 5640      | 24.8       |

|                    |                      |       |      |
|--------------------|----------------------|-------|------|
|                    | Unknown              | 4425  | 19.4 |
| Birth order number | First Order          | 3995  | 17.6 |
|                    | 2–4 Order            | 9840  | 43.2 |
|                    | > 4 Order            | 8920  | 39.2 |
| Child is twin      | Single Birth         | 22102 | 97.1 |
|                    | Multiple Birth       | 653   | 2.9  |
| Place of delivery  | Health facility      | 4247  | 18.7 |
|                    | Home                 | 18508 | 81.3 |
| Method of Delivery | Virginal Delivery    | 22450 | 98.7 |
|                    | By caesarean section | 305   | 1.3  |
| Total              |                      | 22755 | 100  |

284 The majority of neonates in the study were reported being single births, 97.1%), and only 2.9%  
 285 were multiple births (twins). This suggests that the vast majority of births included in the study  
 286 involved single births, with only a small percentage being multiple births. Place of the neonate  
 287 delivery was also the study variable implying that 81.3% of the deliveries occurred at home, and  
 288 the remaining 18.7% of the deliveries took place in a health facility. This distribution shows that  
 289 a significant majority of deliveries in the rural areas of Ethiopia were conducted at home rather  
 290 than in a health facility. Substantial types of deliveries encompassed in the study were vaginal  
 291 deliveries, 98.7%. Only 1.3% of the deliveries were by caesarean section. This indicates that the  
 292 vast majority of deliveries in the rural areas of Ethiopia were vaginal deliveries, with only a  
 293 small percentage requiring a caesarean section (**Table 5**).

#### 294 **Trends of neonatal live status in rural areas**

295 There is a notable EDHS-year disparity in neonatal mortality status. The DHS 2011 encountered  
 296 the highest number of neonatal deaths, 724 (7.5%), followed by DHS 2016 (568 (6.6%)). In the  
 297 2019 DHS data, the slightest numbers of neonatal deaths were recorded. This implies that the  
 298 risk of neonatal mortality in rural Ethiopia is decreasing. This decrease in neonatal mortality  
 299 rates across the DHS years in rural Ethiopia is displayed in the figure below (**Table 5**).



300 **Table 5:-**Trends of neonatal live status across years for trends and determinants of neonatal  
 301 mortality in rural Ethiopia, EDHS, 2011, 2016 and 2019

| Ethiopian DHS Year | Neonate's live status |            |           |            | Total  |
|--------------------|-----------------------|------------|-----------|------------|--------|
|                    | Alive                 |            | Died      |            |        |
|                    | Frequency             | Percentage | Frequency | Percentage |        |
| 2011               | 8,939                 | 92.51      | 724       | 7.49       | 9,663  |
| 2016               | 8,099                 | 93.45      | 568       | 6.55       | 8,667  |
| 2019               | 4,158                 | 93.97      | 267       | 6.03       | 4,425  |
| Total              | 21,196                | 93.15      | 1,559     | 6.85       | 22,755 |

302 This table presents data on total mortality in different regions of Ethiopia across 2011, 2016, and  
 303 2019 years as recorded in the Ethiopian DHS (Demographic and Health Survey). The total  
 304 mortality rate in Tigray decreased over the years from 2011 to 2019. In 2011, 6.7% of children  
 305 died, while in 2019, it decreased to 3.6%. The total mortality rate in Afar also decreased over the  
 306 years, from 8% in 2011 to 4.4% in 2019. Similar trends are observed in other regions, with a  
 307 decrease in total mortality rates from 2011 to 2019, indicating potential improvements in child  
 308 health and healthcare services (**Table 6**).

309  
 310  
 311

312 **Table 6:-**Trends of neonatal mortality by region in rural Ethiopia, EDHS, 2011, 2016 and 2019

| Region    | Ethiopian DHS Year |      |      |     |      |     | Total Mortality |                |
|-----------|--------------------|------|------|-----|------|-----|-----------------|----------------|
|           | 2011               |      | 2016 |     | 2019 |     | Frequency (N)   | Percentage (%) |
|           | N                  | %    | N    | %   | N    | %   |                 |                |
| Tigray    | 71                 | 6.7  | 54   | 6.3 | 25   | 6.6 | 150             | 3.6            |
| Afar      | 79                 | 8    | 71   | 7.3 | 45   | 8.2 | 195             | 4.4            |
| Amhara    | 84                 | 7    | 48   | 5.4 | 21   | 4.6 | 153             | 3.3            |
| Oromiya   | 131                | 8.2  | 106  | 7   | 45   | 7.1 | 282             | 4.1            |
| Somali    | 53                 | 7    | 87   | 7.2 | 40   | 7.6 | 180             | 4              |
| B.Gumuz   | 63                 | 6.7  | 47   | 5.7 | 22   | 4.7 | 132             | 3.3            |
| SNNP      | 117                | 7.7  | 63   | 5.3 | 25   | 4.2 | 205             | 3.4            |
| Gambela   | 44                 | 5.9  | 43   | 8   | 23   | 6.5 | 110             | 3.8            |
| Harari    | 36                 | 8.3  | 32   | 7.9 | 12   | 4.9 | 80              | 4.2            |
| Dire Dawa | 46                 | 10.9 | 17   | 6   | 9    | 4.1 | 72              | 4.4            |
| Total     | 724                | 7.5% | 568  | 6.6 | 267  | 6   | 1559            | 6.9            |

313  
314 Total mortality rates vary between regions and across survey years. In 2019, as an illustration,  
315 the regions with the lowest mortality rates include Gambela (3.8%) and Tigray (3.6%), while the  
316 highest mortality rates are observed in Dire Dawa (4.4%) and Somali (4%).

317 While the general trend indicates a decline, there are regional variations in the pace and  
318 magnitude of this decline. Some regions show more significant reductions in neonatal mortality  
319 rates compared to others. For example, regions like Amhara, Benishangul Gumuz, SNNPR, and  
320 Dire Dawa exhibit consistent decreases in mortality rates over the years, indicating successful  
321 interventions or improvements in healthcare infrastructure and services. On the other hand,  
322 regions like Afar, Somali, Gambella, and slightly Oromiya may show less pronounced declines  
323 or even fluctuations in neonatal mortality rates, suggesting potential challenges or disparities in  
324 healthcare access or quality. This comparison provides insights into how each region fares  
325 compared to the national average.

### 326 **Factors Associated Neonatal Mortality in Rural Ethiopia**

327 Displayed on this table are the logistic regression results pertaining to neonatal mortality, with  
328 the categorization of 1 for death and 0 for survival, and its relationship to various independent  
329 variables. Notably, the results reveal a significant negative correlation between Ethiopian DHS  
330 years and the probability of neonatal mortality.

331 A comparison of data, from Ethiopian Demographic and Health Surveys (EDHS) in 2011, 2016  
332 and 2019, shows that neonatal mortality is decreasing over time. Neonates surveyed in 2016  
333 were 13% less likely to die compared to those in 2011, while newborns in 2019 were 34% less  
334 likely to die than those in 2011. The age of the mother is also a significant factor. Neonates born

335 to mothers aged 25-34 years were 14% less likely to die than those born to mothers aged less  
336 than 25 years. No significant association was found for mothers aged 35-49 years. The study  
337 found that neonatal mortality is negatively correlated with the rich wealth index. The odds ratio  
338 was 0.84 ( $p = 0.00$ ), meaning that a child born to a wealthy mother has a 16% lower chance of  
339 dying compared to a child born to a poor mother. Families with three or more living children  
340 have 88% lower odds of neonatal mortality than families with less than three living children,  
341 according to the study. The adjusted odds ratio was 0.12.

342 The study examined the impact of birth order on the likelihood of neonatal death, dividing it into  
343 three categories: first order, second to fourth order, and more than fourth order. The results  
344 revealed that both second to fourth-order and above-fourth-order were statistically significant  
345 predictors of neonatal death, with infants after the first birth order exhibiting a significantly  
346 higher likelihood of death compared to the first birth order. Specifically, neonates in the 2-4 birth  
347 order have approximately 180% times higher odds of death when compared to the first birth  
348 order, holding constant the effect of other variables in the model. A study found that neonates  
349 born at higher birth orders have significantly higher odds of death. Infants from multiple  
350 deliveries are more likely to die compared to singleton deliveries. The gender of a newborn was  
351 found to have a significant effect on their likelihood of survival. Female infants were 20% less  
352 likely to die compared to male infants ( $OR = 0.80$ ,  $P = 0.00$ ). The time of breastfeeding after  
353 birth was also analyzed, and it was found that immediate breastfeeding was significantly  
354 associated with a 99% decrease in the odds of death compared to delayed breastfeeding at birth  
355 ( $OR = 0.01$ ,  $P = 0.00$ ), while other factors were held constant. These findings indicate a strong  
356 relationship between neonatal mortality and delayed breastfeeding after birth in rural areas  
357 among the population surveyed. Furthermore, the odds of neonatal death were 35% lower for

358 mothers who utilized optimal antenatal care service visits compared to those who did not attend  
 359 these visits (OR = 0.65, P = 0.00).

360 The model includes the size of the baby at birth, and it shows that babies born with a medium  
 361 size have a significant negative association (OR = 0.75, P = 0.00), while babies born with a  
 362 smaller size do not have a significant association. This means that babies born with a medium  
 363 size are 25% more likely to die than babies born with a large size.

364 The model's McFadden's R square value is 0.2098, indicating that the independent variables  
 365 included in the model account for approximately 21% of the variance in neonatal mortality. In  
 366 addition, the model has a relatively good fit to the observed data, as the log-likelihood is -  
 367 5670.54. The link test with a p-value of 0.1369 suggests that there is no strong evidence of a lack  
 368 of fit, and the overall model fits statistically significantly. **(Table 7).**

369  
 370  
 371 **Table 7:-**Multiple logistic regression results predicting neonatal mortality in rural Ethiopia,  
 372 EDHS, 2011, 2016 and 2019

| <b>Neonatal Mortality</b> | <b>B(95% CI)</b>          | <b>SE</b>   | <b>Wald</b>   | <b>AOR(95% CI)</b>       | <b>P-value</b> |
|---------------------------|---------------------------|-------------|---------------|--------------------------|----------------|
| (Constant)                | -1.52(-1.75,-1.30)        | 0.12        | -13.14        | 0.20((0.16,0.24)         | 0.00           |
| EDHS Year (2016)          | <b>-0.16(-0.28,-0.04)</b> | <b>0.06</b> | <b>-2.55</b>  | <b>0.87(0.77,0.98) *</b> | <b>0.01</b>    |
| EDHS Year (2019)          | <b>-0.43(-0.60,-0.25)</b> | <b>0.09</b> | <b>-4.70</b>  | <b>0.66(0.56,0.79) *</b> | <b>0.00</b>    |
| Maternal Age (25-34 yrs.) | -0.16(-0.31,0.00)         | 0.08        | -1.93         | 0.86(0.74,1.01)          | 0.05           |
| Maternal Age (35-49 yrs.) | 0.08(-0.13,0.29)          | 0.11        | 0.74          | 1.09(0.88,1.34)          | 0.46           |
| Wealth Index (Middle)     | -0.09(-0.25,0.07)         | 0.08        | -1.13         | 0.95(0.82,1.11)          | 0.26           |
| Wealth Index (Rich)       | <b>-0.23(-0.39,-0.07)</b> | <b>0.08</b> | <b>-2.86</b>  | <b>0.84(0.73,0.97) *</b> | <b>0.00</b>    |
| No. of Living Child (>=3) | <b>-2.11(-2.29,-1.93)</b> | <b>0.09</b> | <b>-22.83</b> | <b>0.12(0.10,0.15) *</b> | <b>0.00</b>    |
| Birth Order (2-4 Order)   | <b>1.03(0.85,1.21)</b>    | <b>0.09</b> | <b>11.38</b>  | <b>2.80(2.34,3.34) *</b> | <b>0.00</b>    |

|                               |                           |             |               |                          |             |
|-------------------------------|---------------------------|-------------|---------------|--------------------------|-------------|
| Birth Order (>4 Order)        | <b>1.86(1.60,2.11)</b>    | <b>0.13</b> | <b>14.49</b>  | <b>6.39(4.97,8.21) *</b> | <b>0.00</b> |
| Twins (Multiple)              | <b>1.35(1.14,1.55)</b>    | <b>0.10</b> | <b>13.00</b>  | <b>3.83(3.13,4.69) *</b> | <b>0.00</b> |
| Child Sex (Female)            | <b>-0.22(-0.34,-0.11)</b> | <b>0.06</b> | <b>-3.96</b>  | <b>0.80(0.72,0.89) *</b> | <b>0.00</b> |
| BF Time (Instantly)           | <b>-4.40(-4.92,-3.89)</b> | <b>0.26</b> | <b>-16.78</b> | <b>0.01(0.01,0.02) *</b> | <b>0.00</b> |
| No. of ANC (Optimal)          | <b>-0.43(-0.64,-0.21)</b> | <b>0.11</b> | <b>-3.80</b>  | <b>0.66(0.53,0.82) *</b> | <b>0.00</b> |
| No. of ANC (Unknown)          | <b>0.28(0.15,0.41)</b>    | <b>0.06</b> | <b>4.33</b>   | <b>1.32(1.17,1.50) *</b> | <b>0.00</b> |
| Child Size at Birth (Average) | <b>-0.28(-0.43,-0.14)</b> | <b>0.07</b> | <b>-3.80</b>  | <b>0.75(0.65,0.87) *</b> | <b>0.00</b> |
| Child Size at Birth (Smaller) | -0.13((-0.29,0.02)        | 0.08        | -1.72         | 0.87(0.74,1.01)          | 0.09        |

373 Note: B = unstandardized coefficient, SE = standard error, Wald = Wald statistic, OR = odds ratio. \* P < 0.05.

## 374 4. Discussion

375 This study was conducted to examine trends and determinants of neonatal mortality in rural areas  
376 of Ethiopia by using the Ethiopian demographic health survey in 2011, 2016, and 2019

377 In rural Ethiopia, trends of neonatal mortality from 2011 to 2016 decreased from 7.5% to 6.6%,  
378 unlike the very slow decline from 2016 to 2019, which was only 6%. This might be because  
379 Ethiopia has implemented ANC, postnatal care, immunization during and after pregnancy, the  
380 birth corner, basic life support, and birth attendance skills during the period before 2016[30].  
381 This doesn't mean that Ethiopia is not working with the listed strategies from 2016 to 2019 and  
382 till now, but the level of focus is different. This means the implementation of the strategies in  
383 rural areas of Ethiopia might be decreased due to give-back services, which may increase  
384 neonatal mortality.

385 In this study, the trends of neonatal mortality in most regions of Ethiopia increased, especially  
386 from 2016 to 2019. This finding goes together with the national neonatal mortality data, which  
387 shows the incidence of neonatal mortality from 29 to 33 per 1000 live births[5]. The possible  
388 justification could be due to insufficient health extension workers at health posts to deliver the

389 package of essential health services, and the quality of care they provide is suboptimal due to  
390 different factors such as budget constraints, unlike the previous period[31].

391 From the multiple logistic regression, neonates included in the 2016 EDHS are 14.8% (CI:  
392 0.283–0.037) less likely to die compared to those included in the 2011 EDHS. Here, the analysis  
393 shows that time has its effect on neonatal mortality, which could be defined by different factors  
394 such as the modernization and emergence of neonatal devices, scientific evidence, and the use of  
395 neonatal-trained human resources that interns used to give more qualified neonatal care that  
396 decreased the death rate. However, the probability of death among neonates included in the 2019  
397 EDHS was 34.6% (CI: 0.602, 0.248) lower than neonates included in the 2016 EDHS. This  
398 finding shows that the probability of death over the recent period is lower, but there is a  
399 significant difference in each comparison EDHS period. Institutional level readiness differences  
400 during each period, the availability of neonatal intensive care units in most hospitals, and cultural  
401 issues that claimed that neonatal deaths were considered a secret and nothing or some bad  
402 punishment from the creator of the people that collectively affect the care of neonates that ends  
403 with death[32]. This justification works since the attitude, infrastructure, and multiple issues have  
404 been fixed from ancient to recent times. However, there is still a breakup to sustain the decrease  
405 in neonatal mortality from 2011 to 2016 and 2019 EDHS.

406 This study identify that being born from wealth index (rich) family decreases the probability of  
407 neonatal death by 20.8% (CI:0.394,0.073) compared to their counter parts. This finding is similar  
408 with studies conducted in South Asia[33],Ghana[34]and in Ethiopia[35].The possible  
409 justification could be that factors contributing to the high neonatal mortality rate in poor families  
410 might be the lack of access to quality healthcare, maternal malnutrition, which may cause

411 complications, inadequate sanitation and living conditions, which may increase maternal  
412 infection, and limited education and awareness about the dangers of pregnancy.

413 Neonates from a family with a living child of three or more have 88% (CI: 10, 0.15) less chance  
414 of death than those found with less than three. The possible justification could be due to limited  
415 resources; families with fewer members may have limited financial resources and access to  
416 healthcare services; mothers with lower family sizes may be younger; and young mothers often  
417 face increased risks during pregnancy and childbirth, which could boost neonatal mortality.  
418 However, this finding from this study is contrary to the conclusion reported by the study  
419 conducted in Ethiopia using the 2019 EDHS[36].

420 Neonates with birth order 2–4 and >4 order have 2.80(CI: 2.34, 3.34) and 6.39(CI: 4.97, 8.21)  
421 times risk of death compared with birth order 2 and less. This finding is almost similar with the  
422 study conducted in Ethiopia[36,37].The possible justification for this finding could be due to  
423 increased maternal age, which can be accompanied by different neonatal complications  
424 secondary to maternal health, including prematurity.

425 The odds of twin /multiple pregnancy neonatal death is 3.8times(CI:3.13,4.69)) higher than  
426 singleton pregnancy .The finding of this study is in line with previously conducted study in  
427 Ethiopia[38].This can be due to the fact that twin pregnancy is highly risk for preterm birth,  
428 small for gestational age, low birth weight and intrapartum anoxia which individually or  
429 collectively causes for neonatal mortality[39].

430 Based on the finding of this study being femaleness have 20 %( CI: 0.72, 0.89) less likely to died  
431 compared with male neonates. This conclusion agreed with different studies [7,29]. The possible

432 justification for this find might not be biological sound despite different methodological, birth  
433 prevalence difference between the two sexes.

434 The preventive effects of early breast feeding initiation among neonates is 99 % ( CI: 0.01, 0.02)  
435 compared with neonates with delayed breastfeeding initiation. This finding agreed with different  
436 previous studies [29,38,40]. This might be due to multiple uses of first vaccine (breast milk)  
437 which protects the newborn from acquiring infection, decrease complications and reduces  
438 newborn mortality.

439 In this study, optimal ant-natal care has a positive association with neonatal mortality, which  
440 decreases the risk by 34% (CI: 0.53, 0.82), whereas unknown or no ant-natal care increases the  
441 probability of neonatal death by 1.32 times (CI: 1.17, 1.50) compared with neonates born to  
442 mothers having regular ant-natal follow-up care. This finding is comparable with the previous  
443 studies [30,35,36]. This finding is supported by scientific evidence in which antenatal care is  
444 intended to ensure that a woman has a safe pregnancy and allows screening of preeclampsia,  
445 fetal abnormalities, and other prevention strategies to be incorporated. As a result, early  
446 identification and management will be applied, which can decrease neonatal mortality [41].

447 The probability of neonatal death from a probability family of average child size is 25% (CI:  
448 0.65, 0.87) less than neonates from a large family size. This finding is also in line with  
449 previously conducted studies [5,30,36]. This might be due to the larger the family, the less  
450 economical it may be to serve the family, especially the pregnant mother with her fetus, resulting  
451 in different perinatal complications and a poor neonatal outcome, especially in rural areas.

## 452 **Study Limitation**

453 First, the results from the cross-sectional study only refer to one point in time. As a result it,  
454 poses an inability to make cause-and-effect analyses.



## 455 **5. Conclusions**

456 Regions such as Amhara, Benishangul Gumuz, SNNPR, and Dire Dawa have displayed  
457 consistent decreases in mortality rates, reflecting successful interventions or enhancements in  
458 healthcare systems and services.

459 Conversely, regions like Afar, Somali, Gambella, and to a lesser extent Oromia may exhibit less  
460 prominent declines or even fluctuations in neonatal mortality rates, suggesting potential  
461 challenges or disparities in healthcare accessibility or quality.

462 Additionally, factors such as maternal age, birth order, mothers' wealth index, infant sex, birth  
463 size, presence of twins/multiple births, the number of antenatal care visits, and immediate  
464 breastfeeding after birth were found to be significantly associated with neonatal deaths.

465 **Abbreviations:** ANC, Antenatal care; DHS, demographic health survey; EDHS, Ethiopia  
466 demographic health survey; EMDHS, Ethiopia mini demographic health survey; LMICs, Low  
467 and middle-income countries; MDG, Millennium Development Goal; NMR, Neonatal mortality  
468 rate; SDG, Sustainable Development Goals

## 469 **References**

- 470 1. Abay WT. Neonatal mortality and its associated factors among neonates admitted at  
471 public hospitals, pastoral region, Ethiopia: A health facility based study. PLoS One. 2021;  
472 16(3): e0242481..
- 473 2. Muhe LM. Child and Adolescent Health. In: Raviglione, M.C.B., Tediosi, F., Villa, S.,  
474 Casamitjana, N., Plasencia, A. (eds) Global Health Essentials 2023.

- 475 [https://doi.org/10.1007/978-3-031-33851-9\\_7](https://doi.org/10.1007/978-3-031-33851-9_7).
- 476 3. Gomella TL, Cunningham MD, Eyal FG, Tuttle DJ. Neonatology : Management ,  
477 Procedures , On-Call Problems , Diseases , and Drugs , 7e. 2024. 243 p.
- 478 4. Abbing-karahagopian V, Bhat N, Pathirana J, Mu FM, Harris T, Kapoor A, et al. Neonatal  
479 death : Case definition & guidelines for data collection , analysis , and presentation of  
480 immunization safety data. ELSEVIER. 2016;
- 481 5. Girma D, Dejene H, Adugna L. Predictors of Neonatal Mortality in Ethiopia: A  
482 Comprehensive Review of Follow-Up Studies. Int J Pediatr (United Kingdom).  
483 2022;2022:1–4.
- 484 6. Organization WH. Newborns: improving survival and well-being. Delic Living.  
485 2020;29(8):20–37.
- 486 7. Gebremichael MW, Tsadik M, Abebe HT, Gebreegzabiher A, Beyene S, Aregawi AB, et  
487 al. Trends and causes of neonatal mortality from 2010 to 2017 at a Health and  
488 Demographic Surveillance site in Northern Ethiopia. Glob Health Action [Internet].  
489 2023;16(1). Available from: <https://doi.org/10.1080/16549716.2023.2289710>
- 490 8. Masaba BB, Mmusi-Phetoe RM. Neonatal survival in sub-sahara: A review of kenya and  
491 south africa. J Multidiscip Healthc. 2020;13:709–16.
- 492 9. Rosa-Mangeret F, Benski AC, Golaz A, Zala PZ, Kyokan M, Wagner N, et al. 2.5 Million  
493 Annual Deaths—Are Neonates in Low-and Middle-Income Countries Too Small to Be  
494 Seen? A Bottom-Up Overview on Neonatal Morbi-Mortality. Trop Med Infect Dis.  
495 2022;7(5):9148074.

- 496 10. Child U for every. Neonatal mortality. 2023;
- 497 11. Fernández-Sola C, Camacho-ávila M, Hernández-Padilla JM, Fernández-Medina IM,  
498 Jiménez-López FR, Hernández-Sánchez E, et al. Impact of perinatal death on the social  
499 and family context of the parents. *Int J Environ Res Public Health*. 2020;17(10).
- 500 12. Sisay MM, Yirgu R, Gobeza yehu AG, Sibley LM. A qualitative study of attitudes and  
501 values surrounding stillbirth and neonatal mortality among grandmothers, mothers, and  
502 unmarried girls in rural Amhara and Oromiya regions, Ethiopia: Unheard souls in the  
503 backyard. *J Midwifery Women’s Heal*. 2014;59(SUPPL1):2024.
- 504 13. Ravaldi C, Mosconi L, Mannetti L, Checconi M, Bonaiuti R, Ricca V, et al. Post-  
505 traumatic stress symptoms and burnout in healthcare professionals working in neonatal  
506 intensive care units: Results from the STRONG study. *Front Psychiatry*.  
507 2023;14(February):1–12.
- 508 14. Fenta SM, Ayenew GM, Fenta HM, Biresaw HB, Fentaw KD. Community and individual  
509 level determinants of infant mortality in rural Ethiopia using data from 2016 Ethiopian  
510 demographic and health survey. *Sci Rep [Internet]*. 2022;12(1):1–11. Available from:  
511 <https://doi.org/10.1038/s41598-022-21438-3>
- 512 15. Kc A, Jha AK, Shrestha MP, Zhou H, Gurung A, Thapa J, et al. Trends for Neonatal  
513 Deaths in Nepal (2001–2016) to Project Progress Towards the SDG Target in 2030, and  
514 Risk Factor Analyses to Focus Action. *Matern Child Health J*. 2020;24(s1):5–14.
- 515 16. Liu Y, Kang L, He C, Miao L, Qiu X, Xia W, et al. Neonatal mortality and leading causes  
516 of deaths: A descriptive study in China, 2014-2018. *BMJ Open*. 2021;11(2).

- 517 17. Bernardino FBS, Gonçalves TM, Pereira TID, Xavier JS, de Freitas BIBM, Gaíva MAM.  
518 Tendências da mortalidade neonatal no Brasil de 2007 a 2017. *Cienc e Saude Coletiva*.  
519 2022;27(2):567–78.
- 520 18. Soleman SR. The Trends of Neonatal Mortality Rate Among South East Asia Countries  
521 from 2000-2017. *Dis Prev Public Heal J*. 2020;14(2):90.
- 522 19. Anil KC, Basel PL, Singh S. Low birth weight and its associated risk factors: Health  
523 facility-based case-control study. *PLoS One*. 2020;15(6 June):1–10.
- 524 20. Dwomoh D. Geospatial analysis of determinants of neonatal mortality in Ghana. *BMC*  
525 *Public Health*. 2021;21(1):1–18.
- 526 21. Yaya S, Zegeye B, Ahinkorah BO, Ameyaw EK, Seidu AA, Shibre G. Time trends,  
527 geographical, socio-economic, and gender disparities in neonatal mortality in Burundi:  
528 evidence from the demographic and health surveys, 2010–2016. *Arch Public Heal*.  
529 2020;78(1):1–10.
- 530 22. Aynalem YA, Shiferaw WS, Akalu TY, Dargie A, Assefa HK, Habtewold TD. The  
531 Magnitude of Neonatal Mortality and Its Predictors in Ethiopia: A Systematic Review and  
532 Meta-Analysis. *Int J Pediatr (United Kingdom)*. 2021;2021.
- 533 23. Wolde HF, Gonete KA, Akalu TY, Baraki AG, Lakew AM. Factors affecting neonatal  
534 mortality in the general population: Evidence from the 2016 Ethiopian Demographic and  
535 Health Survey (EDHS)-multilevel analysis. *BMC Res Notes [Internet]*. 2019;12(1):1–6.  
536 Available from: <https://doi.org/10.1186/s13104-019-4668-3>
- 537 24. Peter Mumba. Determinants of infant mortality in Luapula province, Zambia: A further

- 538 analysis of the 2018 Zambia Demographic and Health Survey. Univ Zambia. 2021;2588–  
539 93.
- 540 25. Kibria GM Al, Burrowes V, Choudhury A, Sharmeen A, Ghosh S, Mahmud A, et al.  
541 Determinants of early neonatal mortality in Afghanistan: An analysis of the Demographic  
542 and Health Survey 2015. Global Health. 2018;14(1).
- 543 26. Ezeh OK, Odumegwu AO, Oforkansi GH, Abada UD, Ogbo FA, Goson PC, et al. Trends  
544 and Factors Associated with Under-5 Mortality in Northwest Nigeria (2008–2018). Ann  
545 Glob Heal. 2022;88(1):1–12.
- 546 27. Al Kibria GM, Khanam R, Mitra DK, Mahmud A, Begum N, Moin SMI, et al. Rates and  
547 determinants of neonatal mortality in two rural sub-districts of Sylhet, Bangladesh. PLoS  
548 One. 2018;13(11):1–18.
- 549 28. Lukonnga E, Michelo C. Factors associated with neonatal mortality in the general  
550 population: Evidence from the 2007 zambia demographic and health survey (zdhs); a  
551 cross sectional study. Pan Afr Med J. 2015;20(September).
- 552 29. BWD. (Archivist). Trends and Determinants of Neonatal Mortality in Rural Ethiopia:  
553 Evidence from 2011,2016 and 2019 EDHS data. DHS Data. 2024;20850.
- 554 30. Basha GW, Woya AA, Tekil AK. Determinants of neonatal mortality in Ethiopia: An  
555 analysis of the 2016 Ethiopia demographic and health survey. Afr Health Sci.  
556 2020;20(2):715–23.
- 557 31. Woldie M, Dinsa G, Yitbarek K, Agarwal A, Mann C, Abdella E, et al. SCOPING  
558 REPORT Financing Primary Health Care in Ethiopia. BMC Health Serv Res. 2020;20(1).

- 559 32. Tesfaye Dagne FB and DS. Cultural, Institutional and Policy Impact on Neonatal Safety  
560 Practice in Ethiopia: A Concept from Policy Dialogue. IntechOpen. 2023;(SUPPL1):2024.
- 561 33. Nair N, Tripathy P, Prost A, Costello A, Osrin D. Improving newborn survival in low-  
562 income countries: Community-based approaches and lessons from South Asia. PLoS Med.  
563 2010;7(4).
- 564 34. Lartey ST, Khanam R, Takahashi S. The impact of household wealth on child survival in  
565 Ghana. J Health Popul Nutr. 2016;35(1):38.
- 566 35. Fenta SM, Biresaw HB, Fentaw KD. Risk factor of neonatal mortality in Ethiopia:  
567 multilevel analysis of 2016 Demographic and Health Survey. Trop Med Health.  
568 2021;49(1).
- 569 36. Fentaw KD, Fenta SM, Biresaw HB, Yalew MM. Factors associated with post-neonatal  
570 mortality in Ethiopia: Using the 2019 Ethiopia mini demographic and health survey. PLoS  
571 One [Internet]. 2022;17(7 July):1–14. Available from:  
572 <http://dx.doi.org/10.1371/journal.pone.0272016>
- 573 37. Debere HR, Adjiwanou V. The effects of reproductive variables on child mortality in  
574 Ethiopia: evidence from demographic and health surveys from 2000 to 2016. Reprod  
575 Health. 2024;21(1):1–12.
- 576 38. Lartey ST, Khanam R TS. The impact of household wealth on child survival in Ghana. J  
577 Heal Popul Nutr. 2016;35(1):38.
- 578 39. Derebe K, Id F, Muche S, Id F BH. Factors associated with post-neonatal mortality in  
579 Ethiopia : Using the 2019 Ethiopia mini demographic and health survey. PLoS One.

580 2022;1–14.

581 40. Nair N, Tripathy P, Prost A, Costello A OD. Improving newborn survival in low-income  
582 countries: Community-based approaches and lessons from South Asia. PLoS Med.  
583 2010;7(4).

584 41. Ala SH, Husain S, Husain S. Reasons for presenting to antenatal care clinics in a sample  
585 of Pakistani women and their knowledge of WHO antenatal care package. Eur J  
586 Midwifery. 2021;5:1–6.

## 587 **6. Declarations**

### 588 **Consent for publication**

589 Not applicable.

### 590 **Availability of data and Materials**

591 The datasets used and/or analyzed during the current study available from the corresponding  
592 author on reasonable request

### 593 **Competing interests**

594 The authors declare that they have no competing interests.

### 595 **Funding**

596 Not applicable. EDHS data used to conduct the study.

### 597 **Authors' contributions**

598 All authors contributed to the preparation of the manuscript. S.A. prepared the draft manuscript  
599 D.S. collected and conducted analysis then, D.B. and T.G. revised the analysis. M.B., M.G.,  
600 G.T., N.B., Y.S., F.A., and D.T. revised the final draft of the paper. All authors read and  
601 approved the final manuscript.

## 602 **Ethical consideration**

603 In order to utilize the data for research purposes, we obtained a formal grant from the EDHS  
604 team. We followed the ethical principle of not sharing any of the data with anyone.

## 605 **Acknowledgments**

606 We would like to thank the EDHS team for providing us with the data to analyze and draw  
607 conclusions.

608

609

610

611
